# Supplementary material
Source: HighWire-hosted journal article supplement (doi:10.1101/rna.039743.113)
Supplement: SuppFigLegends.docx [file SuppFigLegends.docx]

**Supplemental Figures**

**FIGURE S1.** Temperature profile of RT activity for TeI4f-MRF, TeI4h*-MRF, GsI-IIB-MRF, and TeI4c-NRF RTs. Poly(rA)/oligo(dT)42 (100 nM) and [α-32P]-dTTP (5 μCi; 3,000 Ci/mmole) were incubated with TeI4f-MRF, TeI4h-MRF*, or GsI-IIB-MRF RTs (100 nM, 5 min) or TeI4c-NRF RT (100 nM, 2 min) at the indicated temperature. Polymerization of [32P]-dTTP was measured by binding the labeled products to Whatman DE81 paper and quantifying with a PhosphorImager. The plot shows radioactivity bound to the filter (counts) as a function of reaction temperature.

**FIGURE S2.** Gel assays of cDNA synthesis by the TeI4c-MRF, GsI-IIC-MRF, and SuperScript III RTs. The figure shows the top (full-length cDNAs) and bottom (32P-labeled primer) panels of the gels for which only the top panels are shown in Fig. 2. The arrowheads to the right of the gel indicate the positions of the full-length cDNA product, and the numbers to the left indicate the positions of size markers.

**FIGURE S3.** Sequencing of HeLa and MCF-7 RNA libraries generated with TeI4c-MRF RT. The RNA-seq libraries were the same as in Fig. 5 and were generated from HeLa and MCF-7 RNAs by annealing a oligo(dT)42 primer, reverse transcribing with TeI4c-MRF RT, and synthesizing the second-strand DNA strand by using an NEBNext Second-Strand Synthesis kit (New England Biolabs). The double-strand cDNA libraries were converted to sequencing libraries by using the NEBNext DNA Master Mix set 3, according to manufacturer’s instructions, and paired-end sequenced on a SOLiD 4 instrument (Applied Biosystems). After aligning reads using BioScope v.1.2 to the longest isoforms of each annotated gene from RefSeq (downloaded 11/2010), the distribution of reads per unit length for transcripts of different size classes were plotted for the same curated set of RefSeq transcripts as in Fig. 5.

**Fig. S4.** Sequences of cDNAs synthesized via TeI4c-MRF RT template-switching from the IA-P1 RNA/Pc DNA template/primer substrate to miRNAx with two randomized nucleotide residues at each end. Reverse transcription reactions with the TeI4c-MRF RT were done as in Fig. 6A, and the resulting cDNAs were cloned and sequenced as described in Fig. 6B. After circularization with CircLigase I, the cDNAs were amplified by PCR with the SOLiD 5’ and 3’ primers, TA cloned, and Sanger sequenced with the M13(-20)F primer. The randomized 5’- and 3’-nucleotide positions of the miRNA are shown in dark and light blue, respectively. Mutant nucleotide residues are shown in lower-case letters, and non-templated nucleotide residues are shown in bold lower-case letters. X, indicates nucleotides that could not be identified unambiguously.
