# Supplementary material
Source: HighWire-hosted journal article supplement (doi:10.1101/rna.039743.113)
Supplement: SuppFigsS1-S4.pdf [file SuppFigsS1-S4.pdf]

Fig. S1

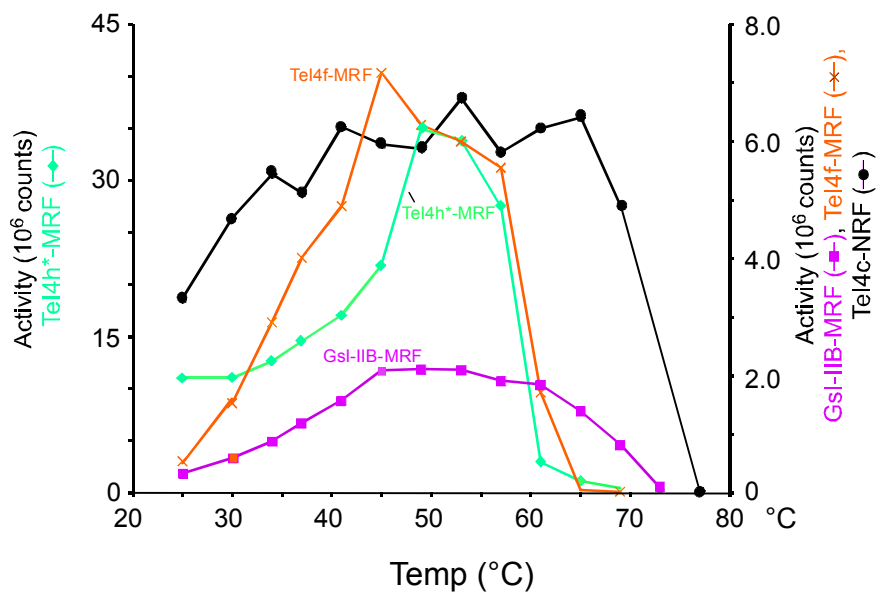

Fig. S2

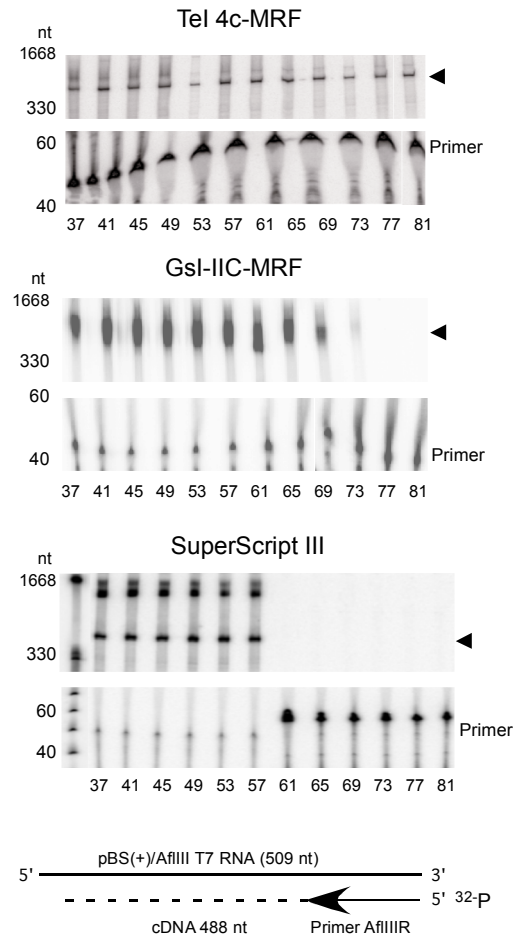

Fig. S3

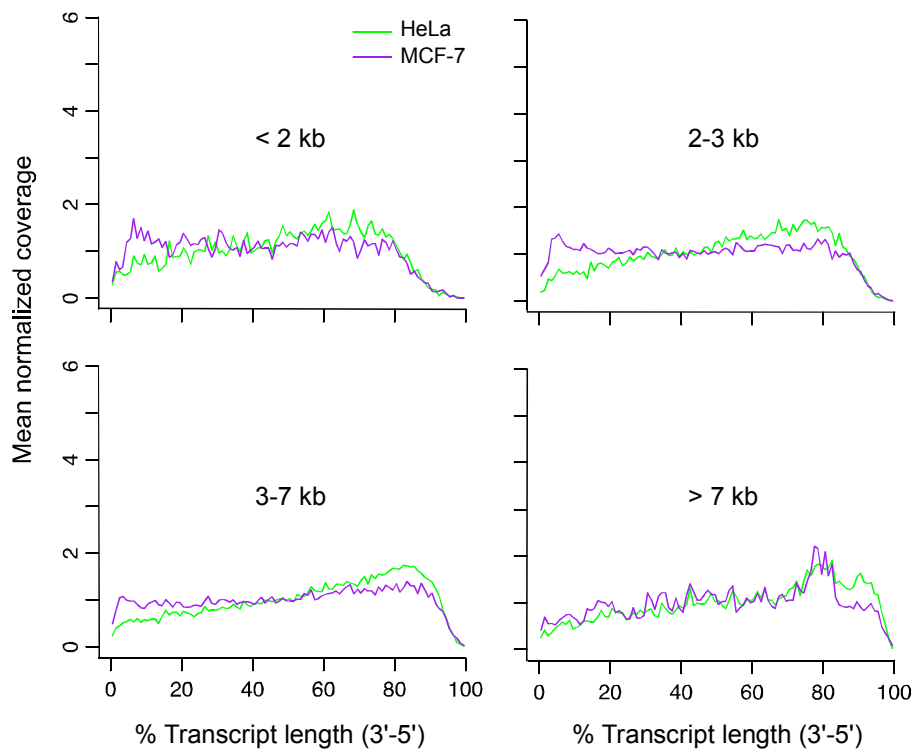

Fig. S4

miRNAx

RNA 5' **NNCGCUUCAGAGAGAAAUCNN**3' IA/P1 RNA  
cDNA 3' **NNCGGAAGTCTCTCTTTAGNN**5' Pc DNA primer

```

cDNA      IA-P1
GAAGTCTCTCTTTA  GCGGAA
GAAGTCTCTCTTTAGTAGCGGAA
TCGCGAAGTCTCGATCGTCGGGCGGAA
TCGCGAAGTCTCTCTTTAGCCGCGGAA
TCGCGAAGTCTCTCTTTAGAAGCGGAA
aCCGCGAAGTCTCTCTTTAGCCGCGGAA
aCGGCGAAGTCTCTCTTTAGTAGCGGAA
gGTGCGAAGTCTCTCTTTAGCCGCGGAA
aGGATTGTGTCTCTCTTTAGTAGCGGAA
aACGGCGAAGTCTCTCTTTAGCCGCGGAA
agTGGCGAAGTCTCTCTTTAGTAGCGGAA
agTXGCGAAGTCTCTCTTTAGGAGCGGAA
agTCGCGAAGTCTCTCTTTAGTAGCGGAA
aaCAGCGAAGTCTCTCTTTAGCCGCGGAA
aaCAGCGAAGTCTCTCTTTAGCCGCGGAA
agGTGCGAAGTCTCTCTTTAGTGGCGGAA
caGAGCGAAGTCTATCTTTAGCAGCGGAA
aaCCGCGAAGTCTCTCTTTAGAGCGGAA
gaaCCGCGAAGTCTCTCTTTAGTCGCGGAA
gaaCTGCGAAGTCTCTCTTTAGAAGCGGAA
agaCCGCGAAGTCTCTCTTTAGCCGCGGAA
taggaCCGCGAAGTCTCTCTTTAGTAGCGGAA
aaactccccaaACGCGAAXTXXXXTTTAGTGGCGGAA
actcccccaaCCGCGAAGTCTCTCTTTAGTCGCGGAA
gtacttgcagacgaCCGCGAAGTCTCTCTTTAGCAGCGGAA

ATGCGAAGTCTCTCTTTAGAGTTGCGAAGTCTCTCTTTAGCCGCGGAA
TTGCGAAGTCTCTCTTTAGC---GCGAAGGATCTCTTTAGCCGCGGAA
aGGCGGAAGTCTCTCTTTAGCAGCGGAAGXATCTCTTTAGAAGCGGAA
aCAGCGAAGTCTCTCTTTAGCATCGCGAAGTCTCTCTTTAGCCGCGGAA
taACGGCGAAGTCTCTCTTTAGATCXCGAAGTCTCTCTTTAGGGGCGGAA
aXGXGCGAAGTCTCTCTTTAGC-TCGCGAAGTCTCTCTTTAGTGGCGGAA
aaCTGCGAAGTCTCTCTTTAGCATCGCGAAGTCTCTCTTTAGCCGCGGAA
ggCTGCGAAGTCTCTCTTTAGGACGCCGAAGGATCTCTTTAGGAGCGGAA
aaaCAGGGGAAGGGTATCTTTAGGCTTGCGAAGTCTCTCTTTAGAAGCGGAA
gtgaCCGCGAAGTCTCTCTTTAGGGCCGCGAAGTCTCTCTTTAGTCGCGGAA
acccccagaTCGCGAAGTCTCTCTTTAGCCGGCGAAGTCTCTCTTTAGCCGCGGAA
```
